# Supplementary material for: Construction of Two Independent RAB Family-Based Scoring Systems Based on Machine Learning Algorithms and Definition of RAB13 as a Novel Therapeutic Target for Hepatocellular Carcinoma
Source: MDPI journal article supplement (doi:10.3390/ijms24054335), 2023-02-22
Supplement: s1 [file s1]

# Supplementary Material

## 1 Supplementary Figures

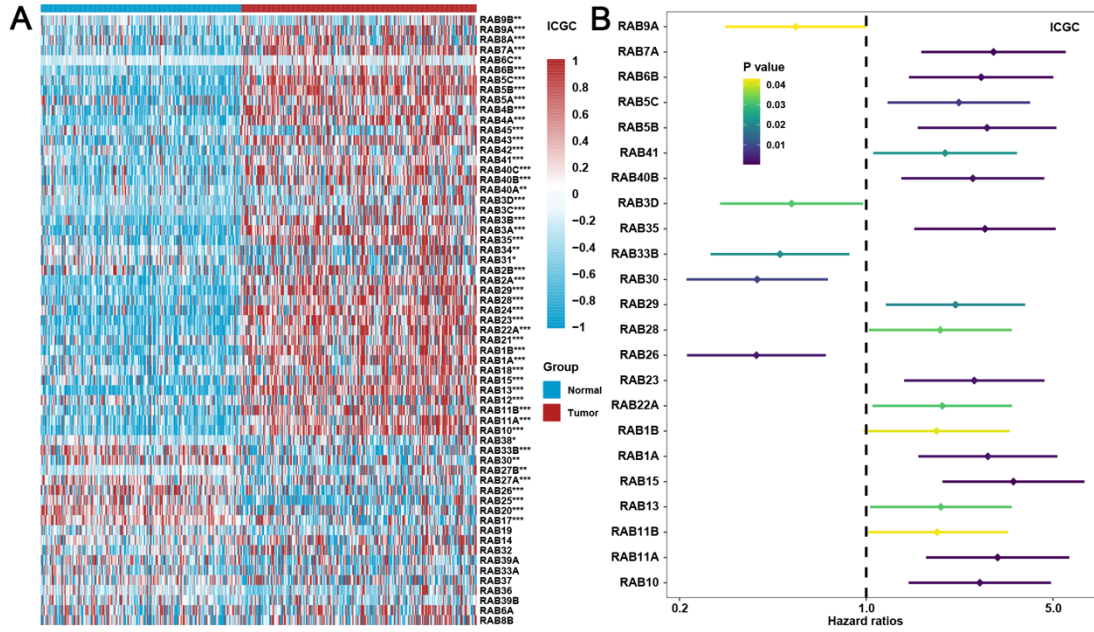

**Figure S1.** (A) Heatmap of RAB family genes in HCC and normal liver (Normal) tissues from the ICGC cohort. (B) Survival analyses for RAB family members of the ICGC cohort.

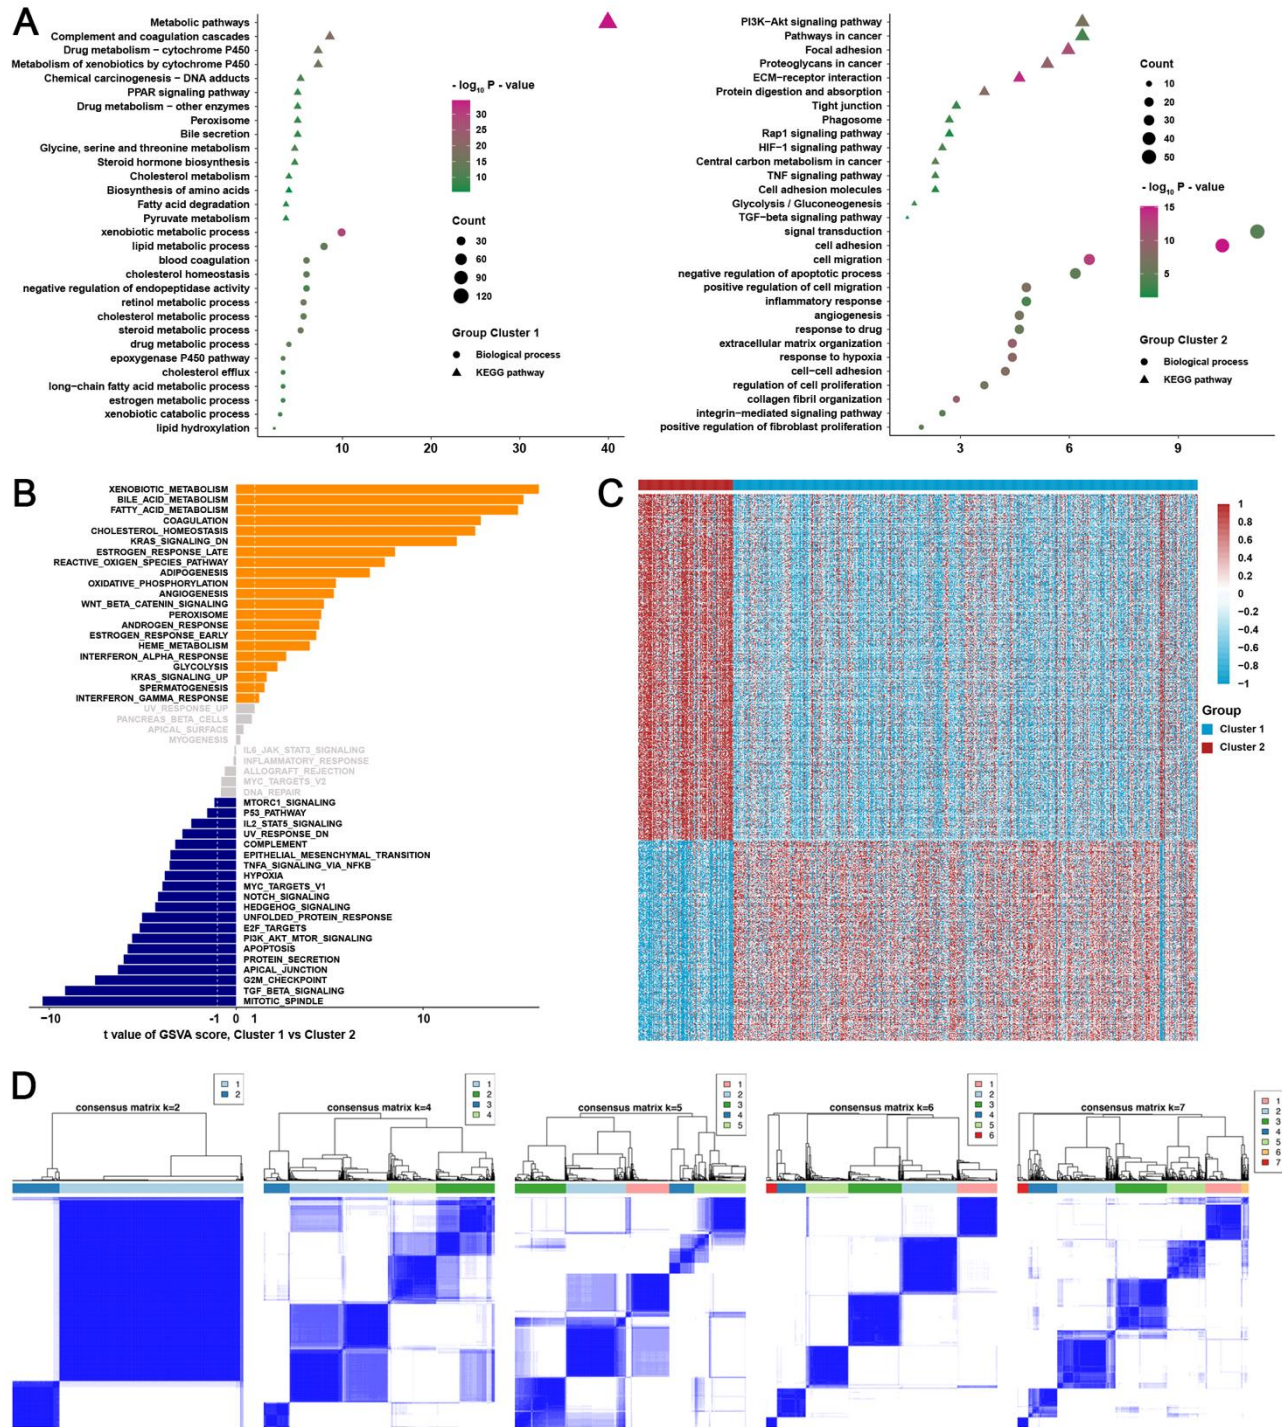

**Figure S2.** (A) KEGG signaling pathway enrichment analysis for two RAB clusters in the pooled HCC cohort. (B) GSEA annotations for two RAB clusters in the pooled HCC cohort. (C) Heatmap exhibiting the differentially expressed genes in the two RAB clusters. (D) Consensus matrices of the pooled HCC cohort for  $k = 2, 4, 5, 6$  and  $7$ .

## 2 Supplementary Tables

**2.1 Table S1: RAS oncogene GTPases (RAB) family from HGNC database.**

**2.2 Table S2: The AUC values of RAB family members in TCGA-LIHC and ICGC-LIHC datasets.**

**2.3 Table S3: The RAB-associated gene signatures contains 830 genes.**

**2.4 Table S4: Coefficients of the genes involved in RAB risk score.**

**2.5 Table S5: Sequences of siRNAs in this study.**

| Primer names         | Sequences                   |
|----------------------|-----------------------------|
| siRAB13-1 sense      | 5'-CGACAAUUCUGGUUACAAAGG-3' |
| siRAB13-1 anti-sense | 5'-UUUGUAACCAGAAUUGUCGUG-3' |
| siRAB13-2 sense      | 5'-GAGCGGUUCAAGACAAUAACU-3' |
| siRAB13-2 anti-sense | 5'-UUAUUGUCUUGAACCGCUCUU-3' |

**2.6 Table S6: The qRT-PCR primers used in this study.**

| Primer names           | Species | Sequences                     |
|------------------------|---------|-------------------------------|
| $\beta$ -actin forward | Human   | 5'-GAAGATCAAGATCATTGCTCC-3'   |
| $\beta$ -actin reverse | Human   | 5'-TACTCCTGCTTGCTGATCCA-3'    |
| RAB13 forward          | Human   | 5'-TTGCAGAGGACAACCTCAACAA-3'  |
| RAB13 reverse          | Human   | 5'-CTATATCCACAGTGCGGATCTTG-3' |

**2.7 Table S7: Primary antibodies used in this study.**

| Antigens | Manufacturer | Catalog Number | Application  |
|----------|--------------|----------------|--------------|
| RAB13    | ABclonal     | A10571         | 1:800 for WB |

|            |             |            |               |
|------------|-------------|------------|---------------|
| PI3K       | Abcam       | Ab191606   | 1:800 for WB  |
| p-PI3K     | Abcam       | Ab182651   | 1:500 for WB  |
| AKT        | Abcam       | Ab179463   | 1:800 for WB  |
| p-AKT      | Abcam       | Ab192623   | 1:500 for WB  |
| IRF4       | Proteintech | 66451-1-Ig | 1:800 for WB  |
| N-cadherin | HUABIO      | ET1607-37  | 1:1000 for WB |
| E-cadherin | HUABIO      | ET1607-75  | 1:1000 for WB |
| Vimentin   | Proteintech | 10366-1-AP | 1:1000 for WB |
| Slug       | Proteintech | 12129-1-AP | 1:1000 for WB |
| JAK2       | HUABIO      | ET1607-35  | 1:800 for WB  |
| p-JAK2     | HUABIO      | ET1607-34  | 1:500 for WB  |
| STAT3      | HUABIO      | ET1607-38  | 1:800 for WB  |
| p-STAT3    | HUABIO      | ET1607-39  | 1:500 for WB  |
| CDK1       | Proteintech | 19532-1-AP | 1:800 for WB  |
| CDK4       | Proteintech | 11026-1-AP | 1:800 for WB  |
| GAPDH      | Proteintech | 60004-1-Ig | 1:2500 for WB |

---

WB, western blotting.

**2.8 Table S8: The gene sets used for estimating the enrichment score in pathway and biological process activity.**
